## Review

# The Impact of Artificial Sweeteners on Insects

Shao-Hung Lee, Dong-Hwan Choe, and Chow-Yang Lee<sup>1,✉</sup>Department of Entomology, University of California, Riverside, CA 92521, and <sup>1</sup>Corresponding author, e-mail: [chowyang.lee@ucr.edu](mailto:chowyang.lee@ucr.edu)

Subject Editor: Murray Isman

Received 20 August 2020; Editorial decision 21 September 2020

## Abstract

Artificial sweeteners are sweet-tasting additives found in consumable products as substitutes for naturally occurring sugars. They are derived from plant extracts or manufactured by chemical synthesis. Ingestion of sweeteners by insects can lead to significant physiological effects, such as mortality, decreased fecundity, and behavioral change. Due to their low toxicity toward humans and the issues associated with conventional insecticide usage, artificial sweeteners have recently gained attention for their potential use as biorational insecticides. Here, we review their impact on insects and potential as novel insecticides.

**Key words:** sugar substitutes, mortality, physiological effects, polyol, additives

Synthetic organic insecticide use has been the primary method of insect pest control for most of the past century (Yu 2014). However, persistent environmental and health concerns such as nontarget effects and bioaccumulation, as well as management concerns such as insecticide resistance have motivated efforts to find alternative treatment strategies (Perveen 2011). Recently, there has been a broad interest in investigating generally recognized-as-safe (GRAS) compounds such as essential oils (Klein et al. 2019) and artificial sweeteners (Burgess et al. 2018, Barrett et al. 2020, Caponera et al. 2020, Wentz et al. 2020) as insecticides for pest management. Due to their low cost, accessibility, and minimal toxicity toward humans, artificial sweeteners are an appealing group of compounds to consider when researching alternative treatment options.

Artificial sweeteners, also known as sugar substitutes, nonnutritive sweeteners, zero-calorie sweeteners, or low-calorie sweeteners, are sweet-tasting additives found in beverages, food, drugs, and other products. These include the sugar alcohols (polyols) and artificially derived compounds such as aspartame, saccharin, sodium cyclamate, acesulfame potassium, and sucralose (Kroger et al. 2006, Chattopadhyay et al. 2014; Table 1). Sweeteners are often marketed as healthy alternatives to naturally occurring sugars due to their lower caloric values and dental health benefits (Kawanabe et al. 1992, Shankar et al. 2013). The projected size of the artificial sweetener market is expected to exceed \$20 billion by 2026 (Watson 2019).

Early studies involving insects and sweeteners primarily focused on the caloric differences between sweetener types, phagostimulation, and the ability of insects to digest or utilize different carbohydrates (Vogel 1931, von Frisch 1934, Haslinger 1935). Many low-calorie sweeteners caused premature death in these feeding assays. However, mortality did not attract attention from an insecticidal standpoint until a brief mention in 1968 discussing a sweetener-induced

starvation method to control flies (Dethier 1968). More recent work on the toxicity of sweeteners revealed a concentration-dependent mortality response to several polyols across multiple insect orders and other physiological detriments such as hindered development and fecundity (Özalp and Emre 2001, Baudier et al. 2014, Caponera et al. 2020).

Baudier et al. (2014) were the first to study the toxicity of erythritol on *Drosophila melanogaster* Meigen (Diptera: Drosophilidae) with explicit consideration of its insecticide potential. More than a dozen similar studies have followed to evaluate this concept across Diptera, Hymenoptera, Blattodea, and Hemiptera (O'Donnell et al. 2016, 2017; Sampson et al. 2016, 2017, 2019; Zheng et al. 2016; Burgess and King 2017; Choi et al. 2017, 2018; Fisher et al. 2017; Goffin et al. 2017; Tang et al. 2017; Zhang et al. 2017; Burgess et al. 2018; Burgess and Geden 2019; Díaz-Fleischer et al. 2019; Fiocca et al. 2019; Barrett et al. 2020; Caponera et al. 2020; Wentz et al. 2020). At the time of the preparation of this review, the effects of sweeteners have been studied across at least six orders and 30 species of insects. This is the first review to consolidate the known impacts of artificial sweeteners on insects to provide a clearer idea of the current progress and gaps for their utilization as insecticides.

## The Impact of Artificial Sweeteners on Insects

### Mortality and Survivorship

Mortality after consuming sweeteners has been observed across a number of taxa, with dipterans receiving the most attention (Table 2). Many polyols diluted in water or media offered to *D. melanogaster* significantly reduce survivorship. Media made with erythritol, mannitol, sorbitol, and glycerol were observed to

**Table 1.** The artificial sweeteners investigated on insects

| Name                         | IUPAC name                                                                                                                    | Common trade names   |
|------------------------------|-------------------------------------------------------------------------------------------------------------------------------|----------------------|
| Polyols                      |                                                                                                                               |                      |
| Erythritol <sup>a</sup>      | (2R,3S)-Butane-1,2,3,4-tetrol                                                                                                 | Truvia               |
| Pentaerythritol              | 2,2-bis(hydroxymethyl)propane-1,3-diol                                                                                        |                      |
| Mannitol                     | (2R,3R,4R,5R)-hexane-1,2,3,4,5,6-hexol                                                                                        |                      |
| Sorbitol                     | (2R,3R,4R,5S)-hexane-1,2,3,4,5,6-hexol                                                                                        |                      |
| Xylitol                      | (2R,3R,4S)-pentane-1,2,3,4,5-pentol                                                                                           |                      |
| Glycerol                     | Propane-1,2,3-triol                                                                                                           |                      |
| Saccharin                    | 1,1-Dioxo-1,2-benzothiazol-3-one                                                                                              | Sweet'N Low          |
| Sodium cyclamate             | Sodium; N-cyclohexylsulfamate                                                                                                 |                      |
| Aspartame                    | (3S)-3-amino-4-[[[(2S)-1-methoxy-1-oxo-3-phenylpropan-2-yl]amino]-4-oxobutanoic acid                                          | NutraSweet,<br>Equal |
| Sucralose                    | (2R,3R,4R,5R,6R)-2-[(2R,3S,4S,5S)-2,5-bis(chloromethyl)-3,4-dihydroxyoxolan-2-yl]oxy-5-chloro-6-(hydroxymethyl)oxane-3,4-diol | Splenda              |
| Acesulfame potassium (Ace K) | Potassium; 6-methyl-2,2-dioxo-1-oxa-2lambda6-thia-3-azanidacyclohex-5-en-4-one                                                | Sweet One            |

<sup>a</sup>Refers to *meso*-erythritol unless specified otherwise.

**Table 2.** Mortality and survivorship of insects after artificial sweetener treatments

| Order                     | Species                        | Artificial sweetener                                                 | Testing method                                                               | Observations                                            | References              |
|---------------------------|--------------------------------|----------------------------------------------------------------------|------------------------------------------------------------------------------|---------------------------------------------------------|-------------------------|
| Diptera                   | <i>Drosophila melanogaster</i> | Erythritol                                                           | Solution; 0.1–0.5 M                                                          | Adult mortality; 50% at 2–3 d                           | Hassett (1948)          |
|                           |                                |                                                                      | Food; 0.0952-g/ml Truvia (99% erythritol, 1% rubiana)                        | Adult mortality; 100% at 5.8 d                          | Baudier et al. (2014)   |
|                           |                                |                                                                      | Food; 0.1–2 M                                                                | Adult mortality; 50% at <5 to <30 d                     | Baudier et al. (2014)   |
|                           |                                |                                                                      | Food; 1–2 M erythritol plus 1 M sucrose                                      | Adult mortality; 50% at <5 to <15 d                     | Baudier et al. (2014)   |
|                           |                                |                                                                      | Food; 1 M                                                                    | Adult mortality; 100% at 6 d                            | O'Donnell et al. (2016) |
|                           |                                |                                                                      | Food; 20-ml 0–2 M Truvia in 3.75 g diet                                      | Adult mortality; LC <sub>50</sub> = 930 mM 4-h exposure | Sampson et al. (2016)   |
|                           |                                |                                                                      | Food; 0–2 M                                                                  | Adult mortality; LC <sub>50</sub> = 1.56 M at 24 h      | O'Donnell et al. (2017) |
|                           |                                |                                                                      | Food; 0–2 M                                                                  | Larval mortality; LC <sub>50</sub> = 0.59 M at 24 h     | O'Donnell et al. (2017) |
|                           |                                |                                                                      | Treated substrate                                                            | No contact toxicity on eggs                             | O'Donnell et al. (2017) |
|                           |                                |                                                                      | Food; 20-ml 0–2 M Truvia in 3.75-g diet                                      | Decreased pupal counts; 0 at > 500 mM                   | Sampson et al. (2016)   |
|                           | Mannitol                       | Solution; 0.1 M                                                      | Adult mortality; 50% at 6 d                                                  | Hassett (1948)                                          |                         |
|                           |                                | Food; 1 M                                                            | Adult mortality; ~50% at 17 d                                                | O'Donnell et al. (2016)                                 |                         |
|                           |                                | Food; 1 M                                                            | Sex dependent differential mortality                                         | O'Donnell et al. (2016)                                 |                         |
|                           |                                | Media; 0.25–2 M                                                      | Sex dependent differential mortality; up to and beyond 50% mortality at 21 d | Fiocca et al. (2019)                                    |                         |
|                           |                                | Sorbitol                                                             | Solution; 0.1 M                                                              | Adult mortality; 50% at 17 d                            | Hassett (1948)          |
|                           |                                | Sorbitol                                                             | Solution; 0.1 M                                                              | Adult mortality; 50% at 5 d                             | Hassett (1948)          |
| <i>Drosophila suzukii</i> | Glycerol                       | Solution; 0.1 M                                                      | Adult mortality; 50% at 14 d                                                 | Hassett (1948)                                          |                         |
|                           |                                | Xylitol                                                              | Food; 1 M                                                                    | Survivorship                                            | O'Donnell et al. (2016) |
|                           | Erythritol                     | Food; 20-ml 0–2 M Truvia (99% erythritol, 1% rubiana) in 3.75 g diet | Adult mortality; LC <sub>50</sub> = 1150 mM 4-h exposure                     | Sampson et al. (2016)                                   |                         |
|                           |                                | Solution; 0.05–1 M                                                   | Adult mortality; 100% at 7 d                                                 | Choi et al. (2017)                                      |                         |
|                           |                                | Solution; 0.5–2 M erythritol and 0.5–1 M sucrose separate            | Survivorship with sucrose choice                                             | Choi et al. (2017)                                      |                         |
|                           |                                | Solution; 0.5–2 M erythritol and 0.5–1 M sucrose                     | Adult mortality; up to 100% at 7 d                                           | Choi et al. (2017)                                      |                         |

Table 2. Continued

| Order | Species                          | Artificial sweetener | Testing method                                                                                            | Observations                                                                                                                                                                             | References                   |
|-------|----------------------------------|----------------------|-----------------------------------------------------------------------------------------------------------|------------------------------------------------------------------------------------------------------------------------------------------------------------------------------------------|------------------------------|
|       |                                  |                      | Solution; 0.5–1 M sucrose and 0.5–2 M erythritol                                                          | Adult mortality; up to 100% at 7 d                                                                                                                                                       | Tang et al. (2017)           |
|       |                                  |                      | Media; 55-g/liter erythritol and/or 55-g/liter sugar                                                      | Adult mortality; up to 100% at 7 d                                                                                                                                                       | Goffin et al. (2017)         |
|       |                                  |                      | Solution; 0.5–2 M erythritol and/or 0.5 M sucrose plus wounded/unwounded blueberries                      | Decreased mortality in presence of wounded blueberries; erythritol and sucrose treatment from 100% at day 7 to 85% or 87%                                                                | Choi et al. (2018)           |
|       |                                  |                      | Treated blackberries; 2 M Truvia (99% erythritol, 1% rubiana)                                             | Larval mortality; 88.9 ± 11.1%                                                                                                                                                           | Sampson et al. (2016)        |
|       |                                  |                      | Media; 0 g/100 ml–2,750 g/100 ml sugar and/or 0 g/100 ml–2,750 g/100 ml erythritol                        | Larval mortality, reduced pupae and adult development                                                                                                                                    | Goffin et al. (2017)         |
|       |                                  |                      | Food; 20-ml 0–2 M Truvia (99% erythritol, 1% rubiana) in 3.75-g diet                                      | Decreased pupal counts; 0 at > 500mM                                                                                                                                                     | Sampson et al. (2016)        |
|       |                                  |                      | Media; 0.25–1 M                                                                                           | Meso-erythritol caused net population decline                                                                                                                                            | Sampson et al. (2019)        |
|       |                                  |                      | Spray; 0.5 M meso-erythritol, 0.5 M pentaerythritol, or 0.25 M meso-erythritol and 0.25 M pentaerythritol | Egg and larvae numbers reduced by pentaerythritol treatment (64 and 93%), meso-erythritol treatment (64 and 93%), and combined treatment (82 and 93%) on blackberry and blueberry bushes | Sampson et al. (2019)        |
|       |                                  |                      | Spray; 0.5 M erythritol (Truvia Baking Blend) and/or 10 ppm lufenuron                                     | Erythritol alone or paired with lufenuron reduced larvae number on <i>Vaccinium virgatum</i> and <i>Rubus</i> sp., ~75%                                                                  | Sampson et al. (2017)        |
|       |                                  | Xylitol              | Solution; 0.05–1 M                                                                                        | Adult mortality; 0.05 M, 30% at 7 d                                                                                                                                                      | Choi et al. (2017)           |
|       |                                  | Mannitol             | Solution; 0.05–1 M                                                                                        | Adult mortality; 0.05 M, 68% at 7 d                                                                                                                                                      | Choi et al. (2017)           |
|       |                                  | Sorbitol             | Solution; 0.05–1 M                                                                                        | Adult mortality; 0.05 M, 50% at 7 d                                                                                                                                                      | Choi et al. (2017)           |
|       |                                  | Glycerol             | Solution; 4.18 M glycerol and 50% sucrose                                                                 | Low mortality; <20% at 72 h                                                                                                                                                              | Diaz-Fleischer et al. (2019) |
|       | <i>Drosophila wheeleri</i>       | Xylitol              | Solution; 5%                                                                                              | Adult mortality                                                                                                                                                                          | Kircher and Al-Azawi (1985)  |
|       |                                  | Mannitol             | Solution; 5%                                                                                              | Adult mortality                                                                                                                                                                          | Kircher and Al-Azawi (1985)  |
|       | <i>Drosophila arizonensis</i>    | Xylitol              | Solution; 5%                                                                                              | Adult mortality                                                                                                                                                                          | Kircher and Al-Azawi (1985)  |
|       | <i>Phormia regina</i>            | Erythritol           | Solution; 0.1 M                                                                                           | Adult mortality; 50% at 3 d                                                                                                                                                              | Hassett et al. (1950)        |
|       |                                  | Glycerol             | Solution; 0.1 M                                                                                           | Adult mortality; 50% at 4.5 d                                                                                                                                                            | Hassett et al. (1950)        |
|       |                                  | Sorbitol             | Solution; 0–1 M                                                                                           | No impact on mortality                                                                                                                                                                   | Gelperin and Dethier (1967)  |
|       | <i>Calliphora erythrocephala</i> | Erythritol           | Solid                                                                                                     | No survivorship; 100% dead at 3.5 d                                                                                                                                                      | Fraenkel (1940)              |
|       |                                  |                      | Solution                                                                                                  | No survivorship; 100% dead at 3.5 d                                                                                                                                                      | Fraenkel (1940)              |
|       |                                  | Sorbitol             | Solid                                                                                                     | Survivorship; 100% dead at 80 d                                                                                                                                                          | Fraenkel (1940)              |
|       |                                  | Mannitol             | Solid                                                                                                     | Survivorship; 100% dead at 41 d                                                                                                                                                          | Fraenkel (1940)              |
|       | <i>Ceratitis capitata</i>        | Mannitol             | Solution; 5–9.1%                                                                                          | Adult mortality; 57–100% at 4 d                                                                                                                                                          | Gothilf et al. (1971)        |
|       | <i>Aedes aegypti</i>             | Erythritol           | Solution; 0.5–2.0 M                                                                                       | Adult female mortality; LC <sub>50</sub> at 3 d was 1.60 M and at 6 d was 0.63 M                                                                                                         | Gilkey et al. (2018)         |
|       |                                  |                      | Solution; 0.1–0.4 M                                                                                       | Larval mortality; 48-h LC <sub>50</sub> = 0.11 M for 3-d-old larvae and 0.42 M for 5-d-old larvae                                                                                        | Gilkey et al. (2018)         |
|       |                                  | Sorbitol             | Solution; 5%                                                                                              | Increased survivorship versus water only; 100% mortality at 63 vs ~9 d                                                                                                                   | Galun and Fraenkel (1957)    |
|       |                                  | Mannitol             | Solution; 5%                                                                                              | Adult mortality; 100% at 6 d                                                                                                                                                             | Galun and Fraenkel (1957)    |
|       |                                  | Glycerol             | Solution; 5%                                                                                              | Adult mortality; 100% at 7 d                                                                                                                                                             | Galun and Fraenkel (1957)    |

Table 2. Continued

| Order | Species                    | Artificial sweetener | Testing method                                                                                 | Observations                                                                                   | References                                          |
|-------|----------------------------|----------------------|------------------------------------------------------------------------------------------------|------------------------------------------------------------------------------------------------|-----------------------------------------------------|
|       | <i>Sarcophaga bullata</i>  | Sorbitol             | Solution; 5%                                                                                   | Increased survivorship versus water only; 100% mortality at 32 vs 5 d                          | Galun and Fraenkel (1957)                           |
|       |                            | Mannitol             | Solution; 5%                                                                                   | Increased survivorship versus water only; 100% mortality at 33 vs 5 d                          | Galun and Fraenkel (1957)                           |
|       |                            | Glycerol             | Solution; 5%                                                                                   | Intermediate survivorship between sucrose and water only; 100% mortality at 10 vs 34 and 5 d   | Galun and Fraenkel (1957)                           |
|       | <i>Anastrepha ludens</i>   | Erythritol           | Unspecified Solution; 1–2.78 M erythritol and 50% sucrose                                      | Adult mortality; 3-d survivorship Adult mortality; 76% at 72 h with 2.78 M treatment           | Baker et al. (1944)<br>Díaz-Fleischer et al. (2019) |
|       |                            | Mannitol             | Unspecified                                                                                    | Adult mortality; 15-d survivorship                                                             | Baker et al. (1944)                                 |
|       |                            | Glycerol             | Solution; 1.67–4.18 M glycerol and 50% sucrose                                                 | Adult mortality; 22–50% at 72 h                                                                | Díaz-Fleischer et al. (2019)                        |
|       | <i>Anastrepha obliqua</i>  | Glycerol             | Solution; 4.18 M glycerol and 50% sucrose                                                      | Adult mortality; ~70%                                                                          | Díaz-Fleischer et al. (2019)                        |
|       | <i>Bactrocera dorsalis</i> | Erythritol           | Solution; 0.082 M                                                                              | Adult mortality; 96.6 ± 2.28% at 60 h                                                          | Zheng et al. (2016)                                 |
|       |                            | Aspartame            | Solution; 0.034 M                                                                              | Adult mortality; 80.0 ± 4.87% at 60 h                                                          | Zheng et al. (2016)                                 |
|       |                            | Saccharin            | Solution; 0.005 M                                                                              | Adult mortality; 62.22 ± 8.01% at 60 h                                                         | Zheng et al. (2016)                                 |
|       | <i>Musca domestica</i>     | Erythritol           | Solution; 0.5–2 M                                                                              | Adult mortality; ~100% at 10 d                                                                 | Burgess and King (2017)                             |
|       |                            |                      | Dried mixture; 10:90, 50:50, 90:10 sucrose–Truvia (99% erythritol, 1% rubiana)                 | Adult mortality; ~20 to 70% by day 14                                                          | Fisher et al. (2017)                                |
|       |                            |                      | Solid; 100% Truvia                                                                             | Adult mortality; ~90% by day 14                                                                | Fisher et al. (2017)                                |
|       |                            |                      | Food; 1-g erythritol and 1–10 g <i>Beauveria bassiana</i> conidia                              | Adult mortality when paired with <i>Beauveria bassiana</i> ; ~100% by day 8                    | Burgess et al. (2018)                               |
|       |                            |                      | Media; 6.0–64.0 mg/g                                                                           | Larval mortality; LC <sub>50</sub> 34.94 mg/g                                                  | Burgess and Geden (2019)                            |
|       |                            |                      | Media; 34.94 mg/g                                                                              | Decreased successful development; 0.7% to pupa, 0% to adult                                    | Burgess and Geden (2019)                            |
|       |                            | Xylitol              | Solution; 0.5–2 M                                                                              | Adult mortality; > 75% at 10 d                                                                 | Burgess and King (2017)                             |
|       |                            |                      | Solid; 100%                                                                                    | Adult mortality; ~70% by day 14                                                                | Fisher et al. (2017)                                |
|       |                            |                      | Food; 1-g erythritol and 1–10 g <i>Beauveria bassiana</i> conidia                              | Adult mortality when paired with <i>Beauveria bassiana</i> ; ~100% by day 8                    | Burgess et al. (2018)                               |
|       |                            |                      | Media; 48.8–97.6 mg/g                                                                          | Larval mortality; LC <sub>50</sub> = 74.91 mg/g                                                | Burgess and Geden (2019)                            |
|       |                            |                      | Media; 74.91 mg/g                                                                              | Decreased successful development; 26.0% to pupa, 23.3% to adult                                | Burgess and Geden (2019)                            |
|       |                            | Sorbitol             | Solid; 100%                                                                                    | No effect on survivorship versus sucrose by day 14                                             | Fisher et al. (2017)                                |
|       |                            |                      | Solution; 5%                                                                                   | Intermediate survivorship between sucrose and water only; 100% mortality at 15 vs 31 and 2.5 d | Galun and Fraenkel (1957)                           |
|       | Mannitol                   | Solid; 100%          | Adult mortality; ~75% by day 14                                                                | Fisher et al. (2017)                                                                           |                                                     |
|       |                            | Solution; 5%         | Intermediate survivorship between sucrose and water only; 100% mortality at 22 vs 31 and 2.5 d | Galun and Fraenkel (1957)                                                                      |                                                     |
|       | Glycerol                   | Solution; 5%         | Intermediate survivorship between sucrose and water only; 100% mortality at 7 vs 31 and 2.5 d  | Galun and Fraenkel (1957)                                                                      |                                                     |
|       | <i>Stomoxys calcitrans</i> | Erythritol           | Media; 10.97–37.03 mg/g                                                                        | Larval mortality; LC <sub>50</sub> = 22.10 mg/g                                                | Burgess and Geden (2019)                            |
|       |                            |                      | Media; 22.10 mg/g                                                                              | Decreased successful development; 33.2% to pupa, 3.2% to adult                                 | Burgess and Geden (2019)                            |
|       |                            | Xylitol              | Media; 16.46–55.56 mg/g                                                                        | Larval mortality; LC <sub>50</sub> = 41.58 mg/g                                                | Burgess and Geden (2019)                            |
|       |                            |                      | Media; 41.58 mg/g                                                                              | Decreased successful development; 40.4% to pupa, 9.6% to adult                                 | Burgess and Geden (2019)                            |

Table 2. Continued

| Order                          | Species                       | Artificial sweetener                                | Testing method                                                  | Observations                                                                                                        | References            |
|--------------------------------|-------------------------------|-----------------------------------------------------|-----------------------------------------------------------------|---------------------------------------------------------------------------------------------------------------------|-----------------------|
| Hymenoptera                    | <i>Tetramorium immigrans</i>  | Erythritol                                          | Food; 0.5–2.0 M                                                 | Concentration dependent worker mortality; up to 100% at 15 d                                                        | Barrett et al. (2020) |
|                                |                               |                                                     | Food; 0.5–2.0 M erythritol and ad lib water separate            | Worker mortality; up to ~50% at 15 d                                                                                | Barrett et al. (2020) |
|                                |                               |                                                     | Food; 0 M or 1.5 M                                              | Horizontal transfer of lethal dose; ~75% mortality in secondarily exposed workers at 15 d                           | Barrett et al. (2020) |
|                                | <i>Formica glacialis</i>      | Erythritol                                          | Food; 1.5 M                                                     | Worker mortality; 100% at 15 d                                                                                      | Barrett et al. (2020) |
|                                |                               |                                                     | Food; 1.5 M and ad lib water separate                           | Worker mortality; ~75% at 15 d                                                                                      | Barrett et al. (2020) |
|                                | <i>Camponotus chromaiodes</i> | Erythritol                                          | Food; 1.5 M and ad lib water separate                           | Worker mortality; <50% at 15 d                                                                                      | Barrett et al. (2020) |
|                                | <i>Camponotus subarbatus</i>  | Erythritol                                          | Food; 1.5 M                                                     | Worker mortality; >50% at 15 d                                                                                      | Barrett et al. (2020) |
|                                | <i>Solenopsis invicta</i>     | Erythritol                                          | Solution; 0.2 g/ml                                              | Worker mortality; >90% at 72 h                                                                                      | Zhang et al. (2017)   |
|                                |                               |                                                     | Solution; 0.001–0.2 g/ml                                        | Caste dependent differential mortality; ~20 to 100% at 72 h                                                         | Zhang et al. (2017)   |
|                                |                               |                                                     | Solution; 0.1-g/ml erythritol and blue dye                      | Horizontal transfer to all castes                                                                                   | Zhang et al. (2017)   |
|                                | <i>Apis mellifera</i>         | Aspartame                                           | Solution; 0.01 g/ml                                             | Worker mortality; >80% at 72 h                                                                                      | Zhang et al. (2017)   |
|                                |                               | Saccharin                                           | Solution; 0.2 g/ml                                              | Worker mortality; >90% at 72 h                                                                                      | Zhang et al. (2017)   |
|                                |                               | Erythritol                                          | Solution; sucrose and erythritol                                | Worker mortality                                                                                                    | Vogel (1931)          |
| <i>Pimpla turionellae</i>      | Sorbitol                      | Solution                                            | Worker mortality                                                | von Frisch (1934)                                                                                                   |                       |
|                                |                               | Solution; 0.5–2.0 M erythritol and/or 0.5 M sucrose | Similar survivorship among treatments                           | Choi et al. (2018)                                                                                                  |                       |
|                                | Mannitol                      | Food; 14%                                           | Adult mortality; 38.58 ± 1.42 d survival                        | Özalp and Emre (2001)                                                                                               |                       |
|                                |                               | Food; 14%                                           | Adult mortality; 15.83 ± 3.79 d survival                        | Özalp and Emre (2001)                                                                                               |                       |
| Blattodea                      | <i>Blattella germanica</i>    | Erythritol                                          | Food; 0.003 moles/g erythritol and 30% casein                   | Reduced survival versus casein and glucose                                                                          | Gordon (1959)         |
|                                |                               | Sorbitol                                            | Food; 0.001–0.002 moles/g sorbitol and 30% casein               | No effect on survival versus casein and glucose                                                                     | Gordon (1959)         |
|                                |                               | Mannitol                                            | Food; 0.002-moles/g mannitol and 30% casein                     | No effect on survival versus casein and glucose                                                                     | Gordon (1959)         |
|                                | Glycerol                      | Food; 0.002-moles/g glycerol and 30% casein         | No effect on survival versus casein and glucose                 | Gordon (1959)                                                                                                       |                       |
| <i>Reticulitermes flavipes</i> | Erythritol                    | Paper towel; 0.25–1.25 M                            | Concentration dependent mortality; 100% by day 8                | Caponera et al. (2020)                                                                                              |                       |
| Hemiptera                      | <i>Bemisia tabaci</i>         | Mannitol                                            | Diet; 10% mannitol, 15% sucrose, 10% FreAmine III               | Adult mortality; ~1-d survival                                                                                      | Hu et al. (2010)      |
|                                |                               |                                                     | Diet; 10% mannitol, 15% sucrose, 5% Difco yeast extract         | No nymph mortality                                                                                                  | Hu et al. (2010)      |
|                                |                               | Sorbitol                                            | Diet; 10% sorbitol, 15% sucrose, 10% FreAmine III               | Adult mortality; ~2-d survival                                                                                      | Hu et al. (2010)      |
|                                |                               |                                                     | Diet; 10% sorbitol, 15% sucrose, 5% Difco yeast extract         | No nymph mortality                                                                                                  | Hu et al. (2010)      |
|                                | <i>Cacopsylla pyricola</i>    | Erythritol                                          | Solution; 1–30%                                                 | Adult mortality; ~10 to ~100% at 3 d                                                                                | Wentz et al. (2020)   |
| Coleoptera                     | <i>Tribolium castaneum</i>    | Mannitol                                            | Gypsum diet; 0.2 M                                              | No impact on mortality                                                                                              | Kikuta (2018)         |
|                                |                               |                                                     | Treated leaves; dipped in 30% erythritol                        | Adult and nymph mortality on treated leaves; ~70% at 3 d                                                            | Wentz et al. (2020)   |
|                                |                               |                                                     | Spray; 20% erythritol or 20% erythritol + Regulaid (surfactant) | Variable nymph reduction in pear orchards; approx.. 20–60%                                                          | Wentz et al. (2020)   |
|                                |                               |                                                     | Treated leaves; heated or unheated erythritol solution          | Heating solution to 31°C during preparation required for reduction; ~70% mortality with heated vs <10% for unheated | Wentz et al. (2020)   |

decrease survivorship of adult *D. melanogaster* compared with sucrose (or other nontoxic material)-only media (Hassett 1948, Baudier et al. 2014, O'Donnell et al. 2016, Sampson et al. 2016,

Fiocca et al. 2019). O'Donnell et al. (2017) also confirmed larval toxicity of erythritol but recorded no contact toxicity toward eggs. *Drosophila suzukii* (Matsumura) (Diptera: Drosophilidae) that

fed on media (Sampson et al. 2016, 2019; Goffin et al. 2017) and solutions (Choi et al. 2017, Tang et al. 2017, Choi et al. 2018, Díaz-Fleischer et al. 2019) treated with erythritol, xylitol, mannitol, or sorbitol also showed increased adult mortality. This effect was reduced for erythritol solutions in the presence of competing food sources (e.g., blueberries; ~14% decrease), but combining erythritol with sucrose increased mortality across all concentrations compared with erythritol alone (Choi et al. 2017, Tang et al. 2017, Choi et al. 2018). The larval impact has also been studied in fruit flies, with erythritol exposure and treatments reducing the overall number of immatures in laboratory and field settings (Goffin et al. 2017; Sampson et al. 2017, 2019).

Erythritol is the most promising polyol for *D. suzukii* control, with a few preliminary tests demonstrating the efficacy and viability of erythritol spray in the field. Several erythritol derivatives were screened by Sampson et al. (2019) to find potential lower-cost alternatives to meso-erythritol (the 'common' erythritol) as potential insecticides. Pentaerythritol was discovered to be an effective adulticide, but only meso-erythritol caused a net population decline in laboratory settings. Several field treatments were conducted to test meso-erythritol and pentaerythritol efficacy on blackberry and blueberry bushes. Both compounds reduced egg and larval numbers by 64 and 93%, respectively, and a combined treatment achieved a greater egg reduction of 82% (Sampson et al. 2019). This corroborated the earlier findings of Sampson et al. (2017) that demonstrated that *D. suzukii* larvae decline on *Vaccinium virgatum* (Aiton) (Ericales: Ericaceae) and *Rubus* sp. (Rosales: Rosaceae) after spray treatment with erythritol.

The toxicity of erythritol and other sweeteners has been observed across other fly groups with diverse feeding strategies. *Phormia regina* (Meigen) (Diptera: Calliphoridae) and *Calliphora erythrocephala* (Macquart) (Diptera: Calliphoridae) reached up to 100% mortality within several days when fed erythritol solutions (Fraenkel 1940, Hassett et al. 1950). *Aedes aegypti* (L.) (Diptera: Culicidae) adult females and larvae were killed when exposed to 0.1–2.0 M erythritol food sources (Gilkey et al. 2018); 5% mannitol and glycerol solutions reduced survival time of adults compared with sucrose solutions and water only (Galun and Fraenkel 1957). The fruit flies *Anastrepha ludens* (Loew) (Diptera: Tephritidae) and *Bactrocera dorsalis* Hendel (Diptera: Tephritidae) succumbed to erythritol solutions, with *An. ludens* also showing a comparable response to glycerol and *B. dorsalis* to aspartame and saccharin solutions as well (Baker et al. 1944, Zheng et al. 2016, Díaz-Fleischer et al. 2019). Multiple authors reported mortality of *Musca domestica* L. (Diptera: Muscidae) after the ingestion of erythritol and xylitol presented as solutions or solids (Burgess and King 2017, Fisher et al. 2017, Burgess et al. 2018). Both sweeteners are toxic to filth fly larvae and reduced the number of successful adult emergences in *M. domestica* and *Stomoxys calcitrans* (L.) (Diptera: Muscidae) by up to 100% when raised in media treated with 22.10–74 mg/g of sweetener (Burgess and Geden 2019).

Despite most assays repeatedly demonstrating the insecticidal effects of erythritol and other polyols toward studied fly species, several compounds consistently have a negligible or opposite effect. In survivorship assays on the ability of flies to use sweeteners as food sources, *Cal. erythrocephala* survived on sorbitol and mannitol, as did *P. regina* on sorbitol (Fraenkel 1940, Hassett et al. 1950, Gelperin and Dethier 1967). Similarly, *Sarcophaga bullata* Parker (Diptera: Sarcophagidae) and *Ae. aegypti* had increased survivorship in the presence of 5% sorbitol solutions versus water only (Galun and Fraenkel 1957). Likewise, no difference in survivorship was observed when *M. domestica* was presented with solid sorbitol compared with sucrose over a 14-d period (Fisher et al. 2017).

Most evaluations of sweetener-induced mortality in Hymenoptera focused on pest ant species. Unlike flies, investigation of toxicants on ants warrants the consideration of horizontal transfer in addition to direct mortality. Barrett et al. (2020) assessed these properties of erythritol on *Tetramorium immigrans* Santschi, *Formica glacialis* Wheeler, *Camponotus chromaiodes* Bolton, and *C. subbarbatus* Emery (Hymenoptera: Formicidae). Workers of all species except *C. chromaiodes* experienced up to 100% mortality when fed 0.5–2.0 M erythritol in nonchoice feeding studies. The addition of a water source reduced mortality by approximately 25–50%. In addition, there was a differential mortality response in *T. immigrans* depending on caste, and workers that had fed on treated solutions were shown to transfer lethal doses to other individuals in the colony (Barrett et al. 2020). Similar effects of erythritol were previously reported by Zhang et al. (2017) who showed worker mortality in *Solenopsis invicta* Buren (Hymenoptera: Formicidae) after feeding on 0.1–20% erythritol, aspartame, or saccharin solutions. Erythritol was potentially transferred throughout the colony, and its toxicity was observed to be concentration and caste-dependent (Zhang et al. 2017).

The European honey bee, *Apis mellifera* L. (Hymenoptera: Apidae), was a frequent subject of early researchers studying survivorship of insects on carbohydrates, in which erythritol was repeatedly shown to be lethal (Vogel 1931, von Frisch 1934). Choi et al. (2018) revisited the impact of erythritol on *Ap. mellifera* survivorship in the context of off-target insecticidal effects of field treatments. The authors concluded that honey bee mortality may occur from prolonged exposure, but this is unlikely in situations where erythritol is purposed for the control of other insects.

There has been limited testing of artificial sweeteners on orders Blattodea and Hemiptera, with only a few studies and species being represented. Recently, Caponera et al. (2020) conducted preliminary laboratory assessments of erythritol as an insecticide for *Reticulitermes flavipes* (Kollar) (Blattodea: Rhinotermitidae). They observed a concentration-dependent worker mortality response between 0.25 and 1.25 M and no preference between treated or untreated paper media (Caponera et al. 2020). An early nutritional study revealed that *Blattella germanica* (Linnaeus) (Blattodea: Ectobiidae) nymphs could not survive on a casein and erythritol diet, although other sweeteners did not affect the tested insects (Gordon 1959).

Hu et al. (2010) reported the insecticidal effects of mannitol and sorbitol on *Bemisia tabaci* (Gennadius) (Hemiptera: Aleyrodidae). Both sweeteners reduced the survival of adults but failed to affect nymphs, although this disparity was not explored further (Hu et al. 2010). By providing solutions and leaves dipped in the solution, Wentz et al. (2020) demonstrated toxicity of erythritol on adult and nymph *Cacopsylla pyricola* (Förster) (Hemiptera: Psyllidae). Spray treatments using 20% erythritol were effective in reducing nymph numbers in the field by up to ~60%, but only when the erythritol solution was heated during preparation (Wentz et al. 2020).

## Impact on Reproduction and Development

In addition to causing mortality, some evidence suggests that certain artificial sweeteners impact the life cycle parameters of insects after sublethal exposure (Table 3). Mannitol-treated media significantly increased the development time of male and female *D. melanogaster* (Fiocca et al. 2019), and exposure of females to 1 M erythritol decreased the overall number of eggs laid (O'Donnell et al. 2017). *Blattella germanica* nymphs were able to develop normally on sorbitol, mannitol, or glycerol mixed with casein, whereas erythritol severely impacted their growth (Gordon 1959).

**Table 3.** Impact of artificial sweeteners on reproduction and development of insects

| Order       | Species                        | Artificial sweeteners                                                                | Testing method                                                                     | Observations                                                                                                                                 | References                                               |
|-------------|--------------------------------|--------------------------------------------------------------------------------------|------------------------------------------------------------------------------------|----------------------------------------------------------------------------------------------------------------------------------------------|----------------------------------------------------------|
| Diptera     | <i>Drosophila melanogaster</i> | Erythritol                                                                           | Food; 1 M                                                                          | No oviposition preference                                                                                                                    | O'Donnell et al. (2017)                                  |
|             |                                |                                                                                      | Food; 1 M                                                                          | Decreasing egg laying with increasing exposure time<br>day 1: ~8 eggs/female-day<br>day 2: ~6 eggs/female-day<br>day 2-7: ~0 eggs/female-day | O'Donnell et al. (2017)                                  |
|             |                                | Mannitol                                                                             | Media; 0.4–0.8 M                                                                   | Ecdysis day delayed for both sexes (approx. 12–15 d) vs 0 M control (~11 d)                                                                  | Fiocca et al. (2019)                                     |
|             | <i>Drosophila suzukii</i>      | Erythritol                                                                           | Media; 0 g/100 ml–2,750 g/100 ml sugar and/or 0 g/100 ml–2,750 g/100 ml erythritol | Decreased egg laying                                                                                                                         | Goffin et al. (2017)                                     |
|             |                                |                                                                                      | Solution; 0.5–1 M sucrose and 0.5–2 M erythritol                                   | Decreased eggs laying at all concentrations of erythritol (<2 to ~6 eggs) vs sucrose control (~22 eggs)                                      | Tang et al. (2017)                                       |
|             |                                | Solution; 0.5–2 M erythritol and/or 0.5 M sucrose plus wounded/unwounded blueberries | Decreased egg laying; ~43% reduction from erythritol treatments                    | Choi et al. (2018)                                                                                                                           |                                                          |
|             |                                | Solution; 0.5–2 M erythritol and/or 0.5 M sucrose                                    | Decreased eggs laid (~7.5/female) vs sucrose only (~15/female)                     | Choi et al. (2018)                                                                                                                           |                                                          |
|             | <i>Musca domestica</i>         | Erythritol                                                                           | Media; 34.94–69.88 mg/g                                                            | No effect on oviposition preference                                                                                                          | Burgess and Geden (2019)                                 |
|             |                                |                                                                                      | Xylitol                                                                            | Media; 74.91–149.82 mg/g                                                                                                                     | Oviposition preference for low versus high concentration |
|             | <i>Stomoxys calcitrans</i>     | Erythritol                                                                           | Media; 22.10–44.20 mg/g                                                            | No effect on oviposition preference                                                                                                          | Burgess and Geden (2019)                                 |
| Xylitol     |                                |                                                                                      | Media; 41.58–83.16 mg/g                                                            | No effect on oviposition preference                                                                                                          | Burgess and Geden (2019)                                 |
| Hymenoptera | <i>Pimpla turionellae</i>      | Mannitol                                                                             | Food; 14%                                                                          | Complete reduction in fertility and fecundity                                                                                                | Özalp and Emre (2001)                                    |
| Blattodea   | <i>Blattella germanica</i>     | Erythritol                                                                           | Food; 0.003 moles/g erythritol and 30% casein                                      | Reduced growth versus casein and glucose                                                                                                     | Gordon (1959)                                            |
|             |                                | Sorbitol                                                                             | Food; 0.001–0.002 moles/g sorbitol and 30% casein                                  | No effect on growth versus casein and glucose                                                                                                | Gordon (1959)                                            |
|             |                                | Mannitol                                                                             | Food; 0.002 moles/g mannitol and 30% casein                                        | No effect on growth versus casein and glucose                                                                                                | Gordon (1959)                                            |
|             |                                | Glycerol                                                                             | Food; 0.002 moles/g glycerol and 30% casein                                        | No effect on growth versus casein and glucose                                                                                                | Gordon (1959)                                            |

Reduction in *D. suzukii* egg numbers after erythritol exposure has been demonstrated on multiple occasions (Goffin et al. 2017, Tang et al. 2017, Choi et al. 2018). Choi et al. (2018) suggest that erythritol affects the fecundity of *D. suzukii* by decreasing egg production and interfering with ovipositional behavior. Flies on a sucrose-only diet laid twice the number of eggs than flies on an erythritol-only or mixed (erythritol and sucrose) diet. Dissections of flies revealed that an erythritol-only diet led to similar amounts of ovarial eggs as a sucrose diet. However, flies on a mixed diet had ~60% more ovarial eggs than flies on the sucrose diet despite laying fewer eggs, suggesting an impact on the oviposition activity itself (Choi et al. 2018).

Some evidence suggests that sweeteners may act as ovipositional deterrents, but current research is minimal. When

offered choices between 74.91 and 149.82 mg/g xylitol treated media, *M. domestica* laid more eggs on the low-concentration media than on the high-concentration media and water-only controls (Burgess and Geden 2019). However, unlike xylitol, erythritol had no effect on egg-laying preference for *M. domestica*, and neither erythritol nor xylitol treated media affected *S. calcitrans* preference (Burgess and Geden 2019). *Drosophila melanogaster* oviposition choice was also shown to be unaffected by the presence of erythritol in treated and untreated food choices (O'Donnell et al. 2017). Wentz et al. (2020) reported that adult *Cac. pyricola* showed a clear preference for untreated versus erythritol-treated leaves for resting, which may reflect oviposition preference behavior.

**Table 4.** Impact of artificial sweeteners on phagostimulation and consumption in insects

| Order                            | Species                        | Artificial sweeteners                | Testing method                                                                   | Observations                                                                                                         | References                                           |
|----------------------------------|--------------------------------|--------------------------------------|----------------------------------------------------------------------------------|----------------------------------------------------------------------------------------------------------------------|------------------------------------------------------|
| Diptera                          | <i>Drosophila melanogaster</i> | Erythritol                           | CAFE <sup>b</sup> ; 5% solutions, erythritol and sucrose separate                | Greater erythritol consumption in females, ~0.015 vs ~0 µl; no difference in males, ~0.0075 µl both                  | Baudier et al. (2014)                                |
|                                  |                                |                                      | CAFE <sup>b</sup> ; 5% solutions, erythritol and sucrose paired choice           | Greater erythritol consumption in both sexes; ~0.015 vs ~0 µl female, ~0.01 vs 0 µl male                             | Baudier et al. (2014)                                |
|                                  |                                | Sorbitol                             | Varied                                                                           | Pairing sorbitol with sweet taste creates preference                                                                 | Burke and Waddell (2011), Fujita and Tanimura (2011) |
|                                  |                                |                                      | PER <sup>a</sup> ; 0.1 M                                                         | 11–16% response                                                                                                      | Gordesky-Gold et al. (2008)                          |
|                                  |                                | Glycerol                             | Agar with dye in microplate; 0.2 M                                               | 79–88% response                                                                                                      | Gordesky-Gold et al. (2008)                          |
|                                  |                                |                                      | PER <sup>a</sup> ; 0.1 M                                                         | 25–43% response                                                                                                      | Gordesky-Gold et al. (2008)                          |
|                                  |                                | Aspartame                            | Agar with dye in microplate; 0.002 M                                             | 69–78% ingestion                                                                                                     | Gordesky-Gold et al. (2008)                          |
|                                  |                                |                                      | PER <sup>a</sup> ; 0.002 M                                                       | 11–16% response                                                                                                      | Gordesky-Gold et al. (2008)                          |
|                                  |                                | Sucralose                            | Agar with dye in microplate; 0.002 M                                             | 69–78% ingestion                                                                                                     | Gordesky-Gold et al. (2008)                          |
|                                  |                                |                                      | PER <sup>a</sup> ; 0.002 M                                                       | 11–16% response                                                                                                      | Gordesky-Gold et al. (2008)                          |
|                                  | Saccharin                      | Agar with dye in microplate; 0.002 M | 89–100% ingestion                                                                | Gordesky-Gold et al. (2008)                                                                                          |                                                      |
|                                  |                                | PER <sup>a</sup> ; 0.002 M           | 11–16% response                                                                  | Gordesky-Gold et al. (2008)                                                                                          |                                                      |
|                                  | Mannitol                       | Agar with dye in microplate; 0.002 M | 69–78% ingestion                                                                 | Gordesky-Gold et al. (2008)                                                                                          |                                                      |
|                                  |                                | CAFE <sup>b</sup> ; 5% solutions     | Sex-dependent feeding; female consumption greater than male; ~0.4 vs ~0 µl/fly/h | Fiocca et al. (2019)                                                                                                 |                                                      |
|                                  | <i>Drosophila suzukii</i>      | Glycerol                             | CAFE <sup>b</sup> ; 5% solutions                                                 | No difference in feeding versus sucrose                                                                              | Fiocca et al. (2019)                                 |
|                                  |                                |                                      | PER <sup>a</sup> ; 4.18 M and 100%                                               | Extensions to 100% glycerol (~4) similar to 50% sucrose (~5)                                                         | Díaz-Fleischer et al. (2019)                         |
|                                  |                                | Erythritol                           | Solution; 0.5 M, erythritol, sucrose, and/or water no choice                     | Greater consumption of erythritol (0.12 µl/fly) than sucrose (0.01 µl/fly) and water (-0.02 µl/fly)                  | Choi et al. (2017)                                   |
|                                  | <i>Phormia regina</i>          | Erythritol                           | Solution; 0.5 M erythritol, sucrose, and/or water choice                         | Greater consumption of sucrose (0.50 µl/fly) and water (0.50 µl/fly) than erythritol (~0.25 to ~0.37 µl/fly) at 72 h | Choi et al. (2017)                                   |
|                                  |                                |                                      | Solution; tarsi contact                                                          | Nonstimulating at all concentrations                                                                                 | Hassett et al. (1950)                                |
|                                  |                                | Glycerol                             | Solution; tarsi contact                                                          | Nonstimulating at all concentrations                                                                                 | Hassett et al. (1950)                                |
| Mannitol                         |                                | Solution; tarsi contact              | No effect on stimulation threshold when mixed with fructose                      | Dethier et al. (1956)                                                                                                |                                                      |
|                                  |                                | Solution; tarsi contact              | Nonstimulating at all concentrations                                             | Hassett et al. (1950)                                                                                                |                                                      |
| Sorbitol                         | Solution                       | Nonstimulating to papillae           | Dethier and Hanson (1965)                                                        |                                                                                                                      |                                                      |
|                                  | Solution; tarsi contact        | Nonstimulating at all concentrations | Hassett et al. (1950)                                                            |                                                                                                                      |                                                      |
| <i>Calliphora erythrocephala</i> | Sorbitol                       | Solution; tarsi and mouthparts       | Stimulation; 0.03 M starvation threshold                                         | Haslinger (1935)                                                                                                     |                                                      |
|                                  | Mannitol                       | Solution; tarsi and mouthparts       | Stimulation; 0.1 M starvation threshold                                          | Haslinger (1935)                                                                                                     |                                                      |
| <i>Ceratitis capitata</i>        | Mannitol                       | Solution; 0.5 M                      | No response in taste receptors                                                   | Gothilf et al. (1971)                                                                                                |                                                      |
| <i>Anastrepha ludens</i>         | Glycerol                       | PER <sup>a</sup> ; 4.18 M and 100%   | Decreased proboscis extensions (~1 to ~4) vs 50% sucrose (~8)                    | Díaz-Fleischer et al. (2019)                                                                                         |                                                      |
| <i>Anastrepha obliqua</i>        | Glycerol                       | PER <sup>a</sup> ; 4.18 M and 100%   | Decreased proboscis extensions (~3) vs 50% sucrose (~14)                         | Díaz-Fleischer et al. (2019)                                                                                         |                                                      |



Table 4. Continued

| Order | Species                   | Artificial sweeteners            | Testing method                   | Observations                                                                  | References                                                                  |                                                                               |                        |
|-------|---------------------------|----------------------------------|----------------------------------|-------------------------------------------------------------------------------|-----------------------------------------------------------------------------|-------------------------------------------------------------------------------|------------------------|
|       | <i>Musca domestica</i>    | Erythritol                       | PER <sup>a</sup> ; 20% solutions | Equal proboscis extensions versus sucrose at same concentrations              | Burgess and King (2017)                                                     |                                                                               |                        |
|       |                           |                                  | PER <sup>a</sup> ; solid         | Similar response (12% female, 34% male) vs sucrose (26% female, 43% male)     | King et al. (2019)                                                          |                                                                               |                        |
|       |                           |                                  | PER <sup>a</sup> ; 20% solutions | Decreased response (17% male, 18% female) vs sucrose (77% both sexes)         | King et al. (2019)                                                          |                                                                               |                        |
|       |                           |                                  | Solid                            | Less consumption versus sucrose                                               | King et al. (2019)                                                          |                                                                               |                        |
|       |                           |                                  | Solution                         | Less consumption versus sucrose                                               | King et al. (2019)                                                          |                                                                               |                        |
|       |                           | Xylitol                          | Solid; 100%                      | Less consumption by adult females versus 100% sucrose; 0.35 mg versus 2.33 mg | Burgess et al. (2018)                                                       |                                                                               |                        |
|       |                           |                                  | PER <sup>a</sup> ; 20% solutions | Equal proboscis extensions versus sucrose at same concentrations              | Burgess and King (2017)                                                     |                                                                               |                        |
|       |                           |                                  | PER <sup>a</sup> ; solid         | Greater response (50% female, 80% male) vs sucrose (26% female, 43% male)     | King et al. (2019)                                                          |                                                                               |                        |
|       |                           |                                  | PER <sup>a</sup> ; 20% solutions | Decreased response (41% male, 37% female) vs sucrose (77% both sexes)         | King et al. (2019)                                                          |                                                                               |                        |
|       |                           |                                  | Solid                            | Similar consumption by females, decreased consumption by males                | King et al. (2019)                                                          |                                                                               |                        |
|       |                           |                                  | Solution                         | Less consumption versus sucrose                                               | King et al. (2019)                                                          |                                                                               |                        |
|       |                           |                                  | Solid; 100%                      | Comparable consumption by adult females versus 100% sucrose                   | Burgess et al. (2019)                                                       |                                                                               |                        |
|       |                           |                                  | Acesulfame potassium             | PER <sup>a</sup> ; solid                                                      | Decreased response (2% female, 11% male) vs sucrose (26% female, 43% male)  | King et al. (2019)                                                            |                        |
|       |                           |                                  |                                  | PER <sup>a</sup> ; 20% solutions                                              | Decreased response (7% male, 0% female) vs sucrose (77% both sexes)         | King et al. (2019)                                                            |                        |
|       |                           |                                  |                                  | Sucralose                                                                     | PER <sup>a</sup> ; solid                                                    | Decreased response (7% female, 14% male) vs sucrose (24–26% female, 43% male) | King et al. (2019)     |
|       |                           | PER <sup>a</sup> ; 20% solutions |                                  |                                                                               | Decreased response (28% male, 25% female) vs sucrose (86% female, 88% male) | King et al. (2019)                                                            |                        |
|       |                           | Sodium cyclamate                 |                                  | PER <sup>a</sup> ; solid                                                      | Similar response (2% female, 5% male) vs sucrose (26% female, 43% male)     | King et al. (2019)                                                            |                        |
|       |                           |                                  | PER <sup>a</sup> ; 20% solutions | Decreased response (7% male, 0% female) vs sucrose (77% both sexes)           | King et al. (2019)                                                          |                                                                               |                        |
|       |                           | Hymenoptera                      | <i>Atta capiguara</i>            | Saccharin                                                                     | Treated cellulose rectangles                                                | Not attractive to workers                                                     | Boaretto et al. (2003) |
|       |                           |                                  |                                  | Sodium cyclamate                                                              | Treated cellulose rectangles                                                | Not attractive to workers                                                     | Boaretto et al. (2003) |
|       | <i>Solenopsis invicta</i> | Erythritol                       | Solution; 1%                     | No more attractive to workers versus water                                    | Vander Meer et al. (1995)                                                   |                                                                               |                        |
|       |                           | Sorbitol                         | Solution; 1%                     | No more attractive to workers versus water                                    | Vander Meer et al. (1995)                                                   |                                                                               |                        |
|       |                           | Mannitol                         | Solution; 1%                     | No more attractive to workers versus water                                    | Vander Meer et al. (1995)                                                   |                                                                               |                        |
|       |                           | Xylitol                          | Solution; 1%                     | No more attractive to workers versus water                                    | Vander Meer et al. (1995)                                                   |                                                                               |                        |
|       | <i>Lasius niger</i>       | Erythritol                       | Solution; mouthparts             | No stimulation of mouthparts                                                  | Schmidt (1938)                                                              |                                                                               |                        |
|       |                           | Mannitol                         | Solution; mouthparts             | No stimulation of mouthparts                                                  | Schmidt (1938)                                                              |                                                                               |                        |
|       |                           | Sorbitol                         | Solution; mouthparts             | Reduced stimulation of mouthparts; 0.25 M minimum threshold                   | Schmidt (1938)                                                              |                                                                               |                        |
|       | <i>Myrmica rubra</i>      | Erythritol                       | Solution; mouthparts             | No stimulation of mouthparts                                                  | Schmidt (1938)                                                              |                                                                               |                        |
|       |                           | Mannitol                         | Solution; mouthparts             | Reduced stimulation of mouthparts; 1.0 M minimum threshold                    | Schmidt (1938)                                                              |                                                                               |                        |
|       |                           | Sorbitol                         | Solution; mouthparts             | Reduced stimulation of mouthparts; 0.0625 M minimum threshold                 | Schmidt (1938)                                                              |                                                                               |                        |
|       | <i>Manica rubida</i>      | Erythritol                       | Solution; mouthparts             | No stimulation                                                                | Schmidt (1938)                                                              |                                                                               |                        |
|       |                           | Mannitol                         | Solution; mouthparts             | No stimulation                                                                | Schmidt (1938)                                                              |                                                                               |                        |
|       |                           | Sorbitol                         | Solution; mouthparts             | No stimulation                                                                | Schmidt (1938)                                                              |                                                                               |                        |

Table 4. Continued

| Order       | Species                          | Artificial sweeteners | Testing method                                                              | Observations                                               | References                                                                  |
|-------------|----------------------------------|-----------------------|-----------------------------------------------------------------------------|------------------------------------------------------------|-----------------------------------------------------------------------------|
| Lepidoptera | <i>Apis mellifera</i>            | Erythritol            | Solution; mouthparts                                                        | No stimulation                                             | Vogel (1931)                                                                |
|             |                                  | Mannitol              | Solution; mouthparts                                                        | No stimulation                                             | von Frisch (1934)                                                           |
|             |                                  | Sorbitol              | Solution; mouthparts                                                        | No stimulation                                             | von Frisch (1934)                                                           |
|             |                                  | Erythritol            | Solution; tarsi                                                             | No stimulation of mouthparts                               | Weis (1930)                                                                 |
| Lepidoptera | <i>Vanessa atalanta</i>          | Mannitol              | Solution; tarsi                                                             | Reduced stimulation of mouthparts; >1.0 M median threshold | Weis (1930)                                                                 |
|             |                                  | Coleoptera            | <i>Tribolium castaneum</i>                                                  | Mannitol                                                   | Two-electrode voltage clamp, <i>Xenopus</i> oocyte expressing <i>TcGr20</i> |
|             | <i>TcGr20</i> silenced with RNAi |                       |                                                                             | Decreased consumption of mannitol treated gypsum block     | Takada et al. (2017)                                                        |
| Coleoptera  | <i>Tribolium castaneum</i>       | Sorbitol              | Two-electrode voltage clamp, <i>Xenopus</i> oocyte expressing <i>TcGr20</i> | Response in presence of sorbitol                           | Takada et al. (2017)                                                        |

<sup>a</sup>Proboscis extension reflex.

<sup>b</sup>Capillary feeder.

### Phagostimulation and Consumption

The palatability of artificial sweeteners holds important implications for their potential as insecticides, especially for baits. Deterrent properties may reduce insecticidal efficacy by lowering the frequency and duration of exposure. Unlike the universally sweet taste of sugars (monosaccharides and disaccharides), artificial sweeteners could vary in magnitude and nature of their reception by insects (Table 4). In many cases, insects have a reduced sensory response to artificial sweeteners, although this could depend on the sweetener type, sweetener concentration, species, and testing method.

Erythritol, glycerol, mannitol, and sorbitol failed to elicit significant proboscis extensions from *P. regina* after tarsal contact, and papillae electrical activity after contact with sorbitol show minimal stimulation of the sugar receptor (Hassett et al. 1950, Dethier and Hanson 1965). Neither *An. ludens* nor *An. obliqua* had comparable proboscis extension reflex (PER) responses toward 4.18 M or 100% glycerol compared with 50% sucrose (Díaz-Fleischer et al. 2019). Taste receptors of *Ceratitis capitata* (Wiedemann) (Diptera: Tephritidae) did not show any response to 0.5 M mannitol (Gothilf et al. 1971). Erythritol and mannitol caused no stimulation and reduced stimulation of *Vanessa atalanta* (Linnaeus) (Lepidoptera: Nymphalidae) mouthparts, respectively (Weis 1930).

Two studies were conducted to assess sweeteners as phagostimulants and attractants for ant baits, but both were unpromising. Saccharin- and sodium cyclamate-treated cellulose were not attractive to *Atta capiguara* (Goncalves) (Hymenoptera: Formicidae) based on lack of carrying by workers (Boaretto et al. 2003). One-percent erythritol, sorbitol, mannitol, and xylitol droplets were no more attractive to *So. invicta* than water, and much less attractive than sugars such as glucose or fructose (Vander Meer et al. 1995). In one of the earliest sweetener studies, erythritol, mannitol, and sorbitol were shown to cause reduced or no stimulation to *Lasius niger* (L.), *Myrmica rubra* (L.), and *Manica rubida* (Latreille) (Hymenoptera: Formicidae) (Schmidt 1938).

Some exceptions include *Drosophila* spp., which appear to be generally receptive to materials perceived as sweet by humans. Aspartame, sucralose, saccharin, glycerol, and sorbitol elicited some proboscis extensions from *D. melanogaster* through tarsal contact and were preferentially ingested when incorporated in agar (Gordesky-Gold et al. 2008). In *D. suzukii*, a high concentration

of glycerol (100%) elicited a similar PER response compared to 50% sucrose when presented in a capillary tube (Díaz-Fleischer et al. 2019). The red flour beetle *Tribolium castaneum* (Herbst) (Coleoptera: Tenebrionidae) was shown to be chemoreceptive of mannitol and sorbitol, and readily consumed mannitol-treated gypsum blocks (Takada et al. 2017).

The gustatory response of *M. domestica* may depend on the physical state of the sweetener and other unknown factors. Twenty percent solutions of erythritol, xylitol, and sucrose were equally stimulatory based on proboscis extensions (Burgess and King 2017). In dry form, xylitol elicited a twofold increase in PER response compared with sucrose, but no significant difference was observed with dry erythritol (King et al. 2019). However, a discrepancy exists between the two studies on the response toward erythritol solution. Unlike the equal response toward erythritol and sucrose reported by Burgess and King (2017), King et al. (2019) found an approximately 77% decrease in PER response toward erythritol compared with sucrose when provided in solutions. Other sweeteners such as acesulfame potassium, sucralose, and sodium cyclamate failed to generate substantial levels of PER response (King et al. 2019).

Despite the marginal response of many insects toward sweeteners, there is no evidence of strong feeding deterrence in any sweetener. Several studies have confirmed consumption of sweeteners by insects through no-choice assays, dyes, or direct measurement, indicating that these compounds are accepted under varying experimental conditions (Baudier et al. 2014, Choi et al. 2017, Fiocca et al. 2019, Caponera et al. 2020). Sweeteners that do not elicit much feeding response from insects may simply be perceived as inert or neutral compounds. In such situations, pairing with a stimulating sugar may cause preferential consumption (Burke and Waddell 2011, Fujita and Tanimura 2011). The success of this method can be seen in assays that showed increased mortality with the addition of sucrose in erythritol treatments compared with the sweetener alone (Choi et al. 2017, 2018, Tang et al. 2017).

### Other Impacts

In some cases, the ingestion of artificial sweeteners causes motor, behavioral, or other physical changes in the insect (Table 5). Climbing ability of *D. melanogaster* was reduced after consuming erythritol, with many postfed adults unable to climb up the side of a vial under

**Table 5.** Other impacts of artificial sweeteners on insects

| Order     | Species                        | Artificial sweeteners                                                                                                   | Testing method                                                                            | Observations                                                                                                                                           | References                   |
|-----------|--------------------------------|-------------------------------------------------------------------------------------------------------------------------|-------------------------------------------------------------------------------------------|--------------------------------------------------------------------------------------------------------------------------------------------------------|------------------------------|
| Diptera   | <i>Drosophila melanogaster</i> | Erythritol                                                                                                              | Food; 0.0952 g/ml Truvia (99% erythritol, 1% rubiana)                                     | Climbing behavior impacted by day 7                                                                                                                    | Baudier et al. (2014)        |
|           |                                | Mannitol                                                                                                                | Media; 0.25–2 M                                                                           | Accumulation of ‘white matter’ in crop                                                                                                                 | Fiocca et al. (2019)         |
|           | <i>Drosophila suzukii</i>      | Erythritol                                                                                                              | Solution; 0.5 M                                                                           | Lower sugar levels in erythritol-fed (~15 µg in males, ~20 µg in females) vs sucrose-fed (~50 µg in males, ~80 µg in females) at 24 h (and 48 h)       | Choi et al. (2017)           |
|           |                                |                                                                                                                         | Solution; 0.5 M                                                                           | Lower glycogen levels in erythritol-fed (~50 µg in males, ~150 µg in females) vs sucrose-fed (~200 µg in males, ~350 µg in females) at 24 h (and 48 h) | Choi et al. (2017)           |
|           |                                | Solution; 0.5 M erythritol and/or 0.5M sucrose                                                                          | Elevated sweetener levels in hemolymph (~60 µg) and absence in frass                      | Tang et al. (2017)                                                                                                                                     |                              |
|           |                                | Solution                                                                                                                | Increased excretion                                                                       | Tang et al. (2017)                                                                                                                                     |                              |
|           | <i>Anastrepha ludens</i>       | Glycerol                                                                                                                | Solution; 4.18 M glycerol and 50% sucrose                                                 | Increased regurgitation (~10 droplets) vs sucrose only (~0 droplets)                                                                                   | Díaz-Fleischer et al. (2019) |
|           |                                |                                                                                                                         | Solution; 2.78 M erythritol and 50% sucrose                                               | Increased regurgitation (~25 droplets) vs sucrose only (~5 droplets)                                                                                   | Díaz-Fleischer et al. (2019) |
|           |                                | Glycerol                                                                                                                | Solution; 1.67–4.18 M glycerol and 50% sucrose                                            | Increased regurgitation (~30 – ~70 droplets) vs sucrose only (~20 droplets)                                                                            | Díaz-Fleischer et al. (2019) |
|           | <i>Anastrepha obliqua</i>      | Glycerol                                                                                                                | Solution; 4.18 M glycerol and 50% sucrose                                                 | Increased regurgitation (~40 droplets) vs sucrose only (~20 droplets)                                                                                  | Díaz-Fleischer et al. (2019) |
|           | <i>Bactrocera dorsalis</i>     | Erythritol                                                                                                              | Solution; 0.008 M                                                                         | Decreased climbing ability (~3 climbing flies) vs sucrose (~7.5 climbing flies) at 24 h                                                                | Zheng et al. (2016)          |
|           |                                |                                                                                                                         | Solution; 0.008 M                                                                         | Increased inactivity (~1 time in 10 min) vs sucrose (~0 times in 10 min)                                                                               | Zheng et al. (2016)          |
| Aspartame |                                | Solution; 0.003 M                                                                                                       | Decreased climbing ability (~3.5 climbing flies) vs sucrose (~7.5 climbing flies) at 24 h | Zheng et al. (2016)                                                                                                                                    |                              |
| Saccharin |                                | Solution; 0.005 M                                                                                                       | Decreased climbing ability (~4 climbing flies) vs sucrose (~7.5 climbing flies) at 24 h   | Zheng et al. (2016)                                                                                                                                    |                              |
|           | Solution; 0.005 M              | Decreased walking (~3.5 times in 10 min) and grooming (~2.5 times in 10 min) vs sucrose (~5.5 and ~3.5 times in 10 min) | Zheng et al. (2016)                                                                       |                                                                                                                                                        |                              |

a standard amount of time (Baudier et al. 2014). Similarly, climbing behavior and frequency of inactivity, walking, or grooming of *B. dorsalis* were impacted after consuming erythritol, aspartame, or saccharin (Zheng et al. 2016).

Sweeteners have also been observed to cause irregularities of the alimentary system. A buildup of ‘white matter’ was found in the alimentary tract of *D. melanogaster* after being killed by mannitol (Fiocca et al. 2019). Erythritol was observed to increase the defecation of *D. suzukii* (Tang et al. 2017). *Drosophila suzukii*, *An. ludens*, and *An. obliqua* experienced significantly increased regurgitation frequency after consuming glycerol (Díaz-Fleischer et al. 2019). These impacts on regurgitation and excretion suggest that sweeteners cause disruption of the alimentary system. Digestion of sweeteners has seldom been studied, but current data show that *D. suzukii* is incapable of digesting erythritol. Analysis of glycogen and sugar levels in the hemolymph of flies that consumed erythritol revealed lower levels than those that consumed sucrose (Choi et al. 2017). Higher levels of erythritol were also detected in the hemolymph of postfed flies compared to feces, indicating that the compound accumulates for extended periods without being metabolized (Tang et al. 2017).

## Proposed Mechanisms and Future Research

The mechanism(s) on how artificial sweeteners exert mortality on insects remains largely unknown. Early researchers assumed that sweeteners induced mortality because of lower caloric values that led to starvation, inability of insects to digest certain compounds, or its unpalatability (Vogel 1931, Fraenkel 1940, Hassett 1948, Dethier 1968). Later evidence provides support that erythritol is indigestible in *D. suzukii* (Choi et al. 2017, Tang et al. 2017), and that starvation was the likely cause of mortality in *M. domestica* (Fisher et al. 2017). However, starvation alone does not explain some of the digestive irregularities observed in *D. melanogaster*, *D. suzukii*, *An. obliqua*, and *An. ludens* (Tang et al. 2017, Díaz-Fleischer et al. 2019, Fiocca et al. 2019), and other data demonstrate that the timing of mortality in sweetener treatment assays may be different from that of the starvation treatment assays (O’Donnell et al. 2016, Zheng et al. 2016, Burgess and King 2017, Goffin et al. 2017). The issue is further complicated in studies where the administration of combined treatments (i.e., sweetener and sucrose in the same resource) or assays with alternative food sources do not completely rescue and may even exacerbate the toxic effect (Burgess and King 2017; Choi et al. 2017, 2018; Tang et al. 2017; Gilkey et al. 2018).

Alternatively, the insects may experience dehydration as a consequence of sweetener ingestion. Provision of a water source in treatment assays has been shown to reduce the potency of erythritol for *Ae. aegypti*, *T. immigrans*, and *F. glacialis* (Gilkey et al. 2018, Barrett et al. 2020). Choi et al. (2017) and Tang et al. (2017) suggest that the indigestibility and buildup of erythritol causes an osmotic imbalance between the alimentary tract and hemocoel. In response to restore homeostasis, the insect may attempt to expel the sweetener through regurgitation or defecation, an effect observed in *D. sukukii*, *An. obliqua*, and *An. ludens* after glycerol consumption (Tang et al. 2017, Díaz-Fleischer et al. 2019). Continuous water loss in this manner may be a contributing factor to mortality, which is potentially also the cause of observations by Sampson et al. (2016) of the 'shriveled' remains of erythritol-killed flies.

Given the high variability of impacts across different insects and sweeteners, mechanisms may also be species-dependent. Future projects designed to rule out confounding variables of these two potential mechanisms for each study organism will more accurately assess the effects of sweeteners. Furthermore, because of the high variation in responses already seen, it is unlikely that any specific sweetener (or a group of sweeteners) has a broad effect on most groups of insects. Methods will need to be designed for family, genus, or even species-specific systems and their implications limited as such. It is worth mentioning, however, that highly specific treatment systems also will be relatively free of off-target effects and have greater value as safe alternatives to conventional insecticides.

Nonetheless, current research does not provide optimal support for sweeteners as viable alternatives to conventional chemical treatments. In many laboratory assays, sweeteners have been tested in concentrations that were much higher than active ingredients in most conventional insecticide sprays or baits (upward of 20% sweetener vs <1% conventional). In fact, frequently tested concentrations of polyols (up to and including 2 M) are within an order of magnitude of their maximum solubilities in water (~4 M) (Yalkowsky et al. 2010). This severely limits the potential to control any insecticide-resistant population with sweeteners due to solubility difficulties when increasing beyond these concentrations to overwhelm resistance. The sweeteners also act slower than conventional insecticides, often taking several days of exposure to reach high levels of mortality. Other untested factors such as limited persistence or longevity under field conditions may also hinder already marginal performance of the compounds.

Because of these issues, the utility of artificial sweeteners as insecticide treatments will need to be carefully considered. Only erythritol treatments for *D. sukukii* have been evaluated in the field; other pest species and sweeteners remain untested. One aspect that can be kept in mind for future studies is the apparent lack of contact toxicity of the sweeteners. Delivery systems should be designed to involve some form of oral administration to ensure optimal performance. To address the comparatively low mortality rates, artificial sweetener treatments may be combined with other strategies to act as a supplement or synergist instead of the sole toxicant. The potential synergistic effect of sweeteners, when combined with other insecticides or formulations, has not been explored and warrants further investigations.

## Acknowledgments

We thank Michael K. Rust for constructive comments on the manuscript draft.

## References Cited

- Baker, A. C., W. E. Stone, C. C. Plummer, and M. McPhail. 1944. A review of studies on the Mexican fruitfly and related Mexican species. U.S. Dept. Agric. Misc. Publ. 531: 1–155.
- Barrett, M., V. Caponera, C. McNair, S. O'Donnell, and D. R. Marenza. 2020. Potential for use of erythritol as a socially transferrable ingested insecticide for ants (Hymenoptera: Formicidae). *J. Econ. Entomol.* 113: 1382–1388.
- Baudier, K. M., S. D. Kaschock-Marenza, N. Patel, K. L. Diangelus, S. O'Donnell, and D. R. Marenza. 2014. Erythritol, a non-nutritive sugar alcohol sweetener and the main component of truvia®, is a palatable ingested insecticide. *PLoS One.* 9: e98949.
- Boaretto, M. A. C., L. C. Forti, J. F. S. Lopes, N. S. Nagamoto, A. P. P. de Andrade, A. A. Moreira, A. E. S. Viana, and V. M. Ramos. 2003. Response of the grass-cutting ant *Atta capiguana* Gonçalves, 1944 (Hymenoptera: Formicidae) to sugars and artificial sweeteners. *Sci. Agric.* 60: 505–509.
- Burgess, E. R., 4th, and C. J. Geden. 2019. Larvicidal potential of the polyol sweeteners erythritol and xylitol in two filth fly species. *J. Vector Ecol.* 44: 11–17.
- Burgess, E. R., 4th, and B. H. King. 2017. Insecticidal potential of two sugar alcohols to *Musca domestica* (Diptera: Muscidae). *J. Econ. Entomol.* 110: 2252–2258.
- Burgess, E. R., D. M. Johnson, and C. J. Geden. 2018. Mortality of the house fly (Diptera: Muscidae) after exposure to combinations of *Beauveria bassiana* (Hypocreales: Clavicipitaceae) with the polyol sweeteners erythritol and xylitol. *J. Med. Entomol.* 55: 8.
- Burke, C. J., and S. Waddell. 2011. Remembering nutrient quality of sugar in *Drosophila*. *Curr. Biol.* 21: 746–750.
- Caponera, V., M. Barrett, D. R. Marenza, and S. O'Donnell. 2020. Erythritol ingestion causes concentration-dependent mortality in eastern subtropical termites (Blattodea: Rhinotermitidae). *J. Econ. Entomol.* 113: 348–352.
- Chattopadhyay, S., U. Raychaudhuri, and R. Chakraborty. 2014. Artificial sweeteners—a review. *J. Food Sci. Technol.* 51: 611–621.
- Choi, M.-Y., S. B. Tang, S. J. Ahn, K. G. Amarasekare, P. Shearer, and J. C. Lee. 2017. Effect of non-nutritive sugars to decrease the survivorship of spotted wing drosophila, *Drosophila sukukii*. *J. Insect Physiol.* 99: 86–94.
- Choi, M.-Y., H. Lucas, R. Sagili, D. H. Cha, and J. C. Lee. 2018. Effect of erythritol on *Drosophila sukukii* (Diptera: Drosophilidae) in the presence of naturally-occurring sugar sources, and on the survival of *Apis mellifera* (Hymenoptera: Apidae). *J. Econ. Entomol.* 112: 981–985.
- Dethier, V. G. 1968. To each his taste. *Bull. Entomol. Soc. Am.* 14: 10–14.
- Dethier, V. G., and F. E. Hanson. 1965. Taste papillae of the blowfly. *J. Cell. Comp. Physiol.* 65: 93–99.
- Dethier, V. G., D. R. Evans, and M. V. Rhoades. 1956. Some factors controlling the ingestion of carbohydrates by the blowfly. *Biol. Bull.* 111: 204–222.
- Díaz-Fleischer, F., J. Arredondo, R. Lasa, C. Bonilla, D. Debernardi, D. Pérez-Staples, and T. Williams. 2019. Sickly sweet: insecticidal polyols induce lethal regurgitation in dipteran pests. *Insects* 10: 53.
- Fiocca, K., M. Barrett, E. A. Waddell, J. Viveiros, C. McNair, S. O'Donnell, and D. R. Marenza. 2019. Mannitol ingestion causes concentration-dependent, sex-biased mortality in adults of the fruit fly (*Drosophila melanogaster*). *PLoS One.* 14: e0213760.
- Fisher, M. L., F. E. Fowler, S. S. Denning, and D. W. Watson. 2017. Survival of the house fly (Diptera: Muscidae) on truvia and other sweeteners. *J. Med. Entomol.* 54: 999–1005.
- Fraenkel, G. 1940. Utilization and digestion of carbohydrates by the adult blowfly. *J. Exp. Biol.* 17: 18–29.
- von Frisch, K. 1934. Über den Geschmackssinn der Biene. *Z. vergl. Physiol.* 21: 1–156.
- Fujita, M., and T. Tanimura. 2011. *Drosophila* evaluates and learns the nutritional value of sugars. *Curr. Biol.* 21: 751–755.
- Galun, R., and G. Fraenkel. 1957. Physiological effects of carbohydrates in the nutrition of a mosquito, *Aedes aegypti* and two flies, *Sarcophaga bullata* and *Musca domestica*. *J. Cell. Comp. Physiol.* 50: 1–23.
- Gelperin, A., and V. G. Dethier. 1967. Long-term regulation of sugar intake by the blowfly. *Physiol. Zool.* 40: 218–228.

- Gilkey, P. L., D. T. Bolshakov, J. G. Kowala, L. A. Taylor, S. O'Donnell, D. R. Marendia, and L. K. Sirot. 2018. Lethal effects of erythritol on the mosquito *Aedes aegypti* Linnaeus (Diptera: Culicidae). *J. Appl. Entomol.* 142: 873–881.
- Goffin, J., N. Gallace, N. Berkvens, H. Casteels, M. De Ro, D. Bylemans, and T. Beliën. 2017. Toxicity of erythritol, a sugar alcohol and food additive, to *Drosophila suzukii* (Matsumura), pp. 843–848. *In* Y. Desjardins ed., VIII International Strawberry Symposium. International Society for Horticultural Science, Québec City, Canada.
- Gordesky-Gold, B., N. Rivers, O. M. Ahmed, and P. A. Breslin. 2008. *Drosophila melanogaster* prefers compounds perceived sweet by humans. *Chem. Senses.* 33: 301–309.
- Gordon, H. T. 1959. Minimal nutritional requirements of the German roach, *Blattella germanica* L. *Ann. N.Y. Acad. Sci.* 77: 290–351.
- Gothilf, S., R. Galun, and M. Bar-Zeev. 1971. Taste reception in the Mediterranean fruit fly: Electrophysiological and behavioural studies. *J. Insect Physiol.* 17: 1371–1384.
- Haslinger, F. 1935. Über den Geschmacksinn von *Calliphora erythrocephala* Meigen und über die Verwertung von Zuckern und Auckeralkoholen durch diese Fliege. *Z. Vergl. Physiol.* 22: 614–640.
- Hassett, C. C. 1948. The utilization of sugars and other substances by *Drosophila*. *Biol. Bull.* 95: 114–123.
- Hassett, C. C., V. G. Dethier, and J. Gans. 1950. A comparison of nutritive values and taste thresholds of carbohydrates for the blowfly. *Biol. Bull.* 99: 446–453.
- Hu, J. S., D. B. Gelman, M. E. Salvucci, Y. P. Chen, and M. B. Blackburn. 2010. Insecticidal activity of some reducing sugars against the sweet potato whitefly, *Bemisia tabaci*, Biotype B. *J. Insect Sci.* 10: 1–22.
- Kawanabe, J., M. Hirasawa, T. Takeuchi, T. Oda, and T. Ikeda. 1992. Noncarcinogenicity of erythritol as a substrate. *Caries Res.* 26: 358–362.
- Kikuta, S. 2018. Response of *Tribolium castaneum* to dietary mannitol, with remarks on its possible nutritive effects. *PLoS One.* 13: e0207497.
- King, B. H., E. E. Taylor, and E. R. Burgess. 2019. Feeding response to select monosaccharides, sugar alcohols, and artificial sweeteners relative to sucrose in adult house flies, *Musca domestica* (Diptera: Muscidae). *J. Med. Entomol.* 57: 511–518.
- Kircher, H. W., and B. Al-Azawi. 1985. Longevity of seven species of cactophilic *Drosophila* and *D. melanogaster* on carbohydrates. *J. Insect Physiol.* 31: 165–169.
- Klein, M.L., T.G. Chastain, C.J. Garbacik, Y.P.L. Qian, and R.J. Mc Donnell. 2019. Acute toxicity of essential oils to the pest slug *Deroceras reticulatum* in laboratory and greenhouse bioassays. *J. Pest Sci.* 93: 415–425.
- Kroger, M., K. Meister, and R. Kava. 2006. Low-calorie sweeteners and other sugar substitutes: A review of the safety issues. *Comp. Rev. Food Sci. Food Safety* 5: 35–47.
- O'Donnell, S., K. Baudier, and D. R. Marendia. 2016. Non-nutritive polyol sweeteners differ in insecticidal activity when ingested by adult *Drosophila melanogaster* (Diptera: Drosophilidae). *J. Insect Sci.* 16: 47.
- O'Donnell, S., K. Baudier, K. Fiocca, and D. R. Marendia. 2017. Erythritol ingestion impairs adult reproduction and causes larval mortality in *Drosophila melanogaster* fruit flies (Diptera: Drosophilidae). *J. Appl. Entomol.* 142: 37–42.
- Özalp, P., and I. Emre. 2001. The effects of carbohydrates upon the survival and reproduction of adult female *Pimpla turionellae* L. (Hym., Ichneumonidae). *J. Appl. Entomol.* 125: 177–180.
- Perveen, F. 2011. Insecticides—advances in integrated pest management. InTech, Rijeka, Croatia.
- Sampson, B. J., C. T. Werle, S. J. Stringer, and J. J. Adamczyk. 2016. Ingestible insecticides for spotted wing drosophila control: A polyol, erythritol, and an insect growth regulator, lufenuron. *J. Appl. Entomol.* 141: 8–18.
- Sampson, B. J., D. A. Marshall, B. J. Smith, S. J. Stringer, C. T. Werle, D. J. Magee, and J. J. Adamczyk. 2017. Erythritol and lufenuron detrimentally alter age structure of wild *Drosophila suzukii* (Diptera: Drosophilidae) populations in blueberry and blackberry. *J. Econ. Entomol.* 110: 530–534.
- Sampson, B. J., M. W. Easson, S. J. Stringer, C. T. Werle, D. Magee, and J. J. Adamczyk. 2019. Laboratory and field assessments of erythritol derivatives on the survival, reproductive rate, and control of *Drosophila suzukii* (Diptera: Drosophilidae). *J. Econ. Entomol.* 112: 173–180.
- Schmidt, A. 1938. Geschmacksphysiologische Untersuchungen an Ameisen. *Z. vergl. Physiol.* 25: 351–378.
- Shankar, P., S. Ahuja, and K. Sriram. 2013. Non-nutritive sweeteners: review and update. *Nutrition.* 29: 1293–1299.
- Takada, T., R. Sato, and S. Kikuta. 2017. A mannitol/sorbitol receptor stimulates dietary intake in *Tribolium castaneum*. *PLoS One.* 12: e0186420.
- Tang, S. B., J. C. Lee, J. K. Jung, and M. Y. Choi. 2017. Effect of erythritol formulation on the mortality, fecundity and physiological excretion in *Drosophila suzukii*. *J. Insect Physiol.* 101: 178–184.
- Vander Meer, R. K., C. S. Lofgren, and J. A. Seawright. 1995. Specificity of the red imported fire ant (Hymenoptera: Formicidae) phagostimulant response to carbohydrates. *Fla. Entomol.* 78: 144.
- Vogel, B. 1931. Über die Beziehungen zwischen Süßgeschmack und Nährwert von Zuckern und Zuckeralkoholen bei der Honigbiene. *Z. vergl. Physiol.* 14: 273–347.
- Watson, J. 2019. Sugar Substitutes Market to Reach USD 21.54 Billion By 2026 | Reports And Data. (<https://www.globenewswire.com/news-release/2019/04/25/1809949/0/en/Sugar-Substitutes-Market-To-Reach-USD-21-54-Billion-By-2026-Reports-And-Data.html>). Assessed October 14, 2020.
- Weis, I. 1930. Versuche über die Geschmacksrezeption durch die Tarsen des Admirals, *Pyrameis atalanta* L. *Z. vergl. Physiol.* 12: 206–248.
- Wentz, K., W. R. Cooper, D. R. Horton, R. Kao, and L. B. Nottingham. 2020. The artificial sweetener, erythritol, has insecticidal properties against pear psylla (Hemiptera: Psyllidae). *J. Econ. Entomol.* 113: 2293–2299.
- Yalkowsky, S., Y. He, and P. Jain. 2010. Handbook of aqueous solubility data, second edition. CRC Press, Boca Raton, FL.
- Yu, S. J. 2014. The toxicology and biochemistry of insecticides, second edition. CRC Press, Boca Raton, FL.
- Zhang, X., S. Chen, Z. Li, and Y. Xu. 2017. Effect of sweeteners on the survival of *Solenopsis invicta* (Hymenoptera: Formicidae). *J. Econ. Entomol.* 110: 593–597.
- Zheng, C., L. Zeng, and Y. Xu. 2016. Effect of sweeteners on the survival and behaviour of *Bactrocera dorsalis* (Hendel) (Diptera: Tephritidae): Effect of sweeteners on *Bactrocera dorsalis*. *Pest Manag. Sci.* 72: 990–996.
